# Supplementary material
Source: PubMed Central journal article supplement (PMC3135954)
Supplement: supp_pp.111.177741_Supplemental_data_Lozano-Juste_and_Leon.pdf [file supp_pp.111.177741_Supplemental_data_Lozano-Juste_and_Leon.pdf]

LEGENDS FOR SUPPLEMENTARY FIGURES

Fig. S1

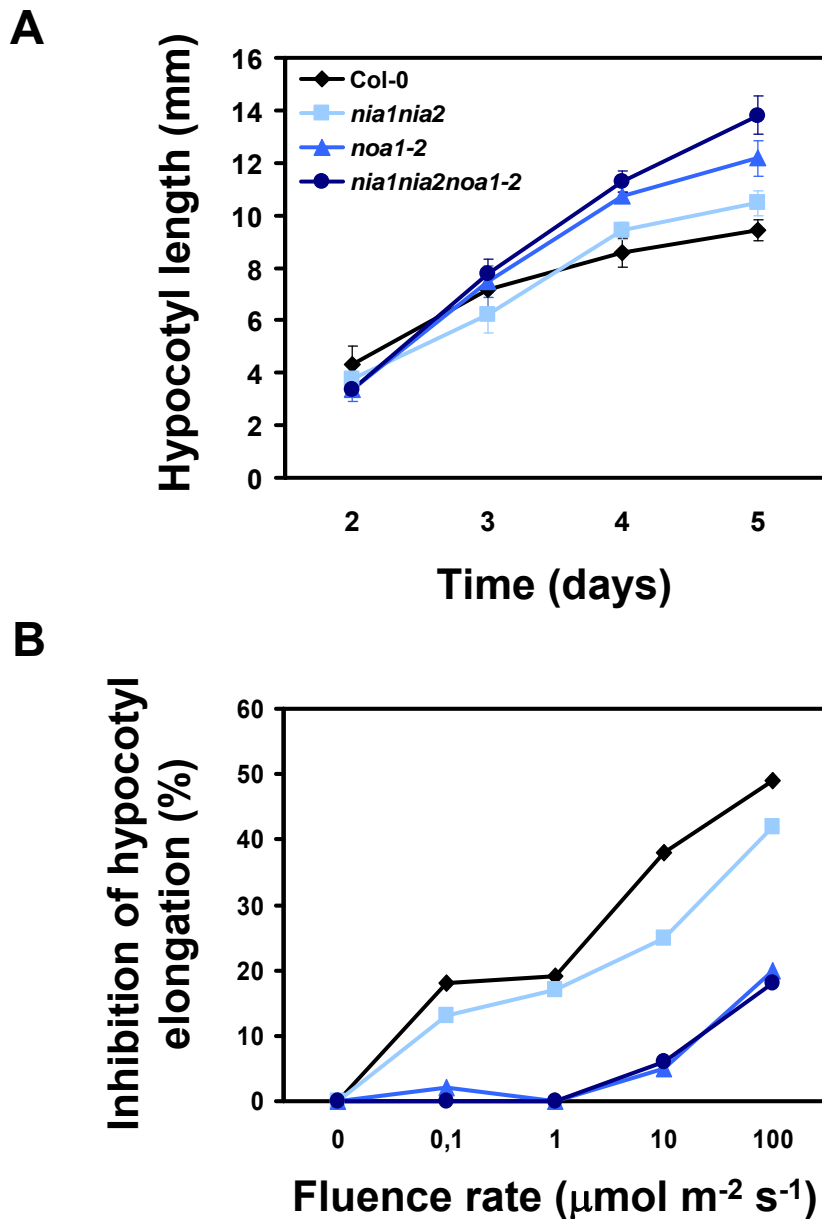

**Figure S1.** Time- and fluence rate-dependence effect of red light on the elongation of wild type and NO-deficient hypocotyls. (A) Hypocotyl length was measured at the indicated times after illumination with  $20 \mu\text{mol m}^{-2} \text{s}^{-1}$  of red light. Values are the mean  $\pm$  standard error ( $n = 20$ ). (B) Rate of inhibition of hypocotyl elongation by increasing fluence rates of red light was expressed after measuring hypocotyls lengths of the different genotypes by 5 days after illumination with the indicated doses of red light.

Fig. S2

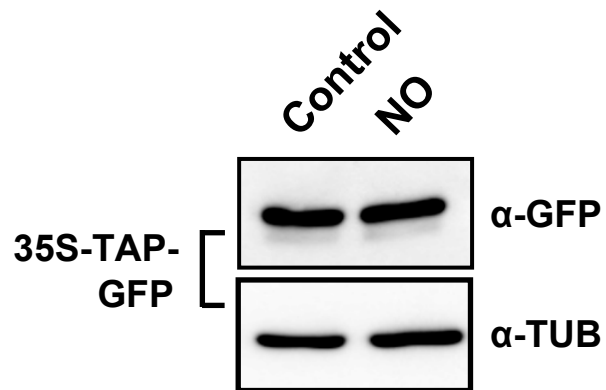

**Figure S2.** Similar levels of GFP in NO-treated and control untreated *35S-TAP-GFP* seedlings. *35S-TAP-GFP* seedlings were used to analyze protein levels in seedlings treated with 250  $\mu$ M SNP (NO) for 2.5 h or untreated (Control). TAP-GFP was detected with anti-GFP antibodies and the levels of tubulin (TUB) are shown as loading control.

Fig. S3

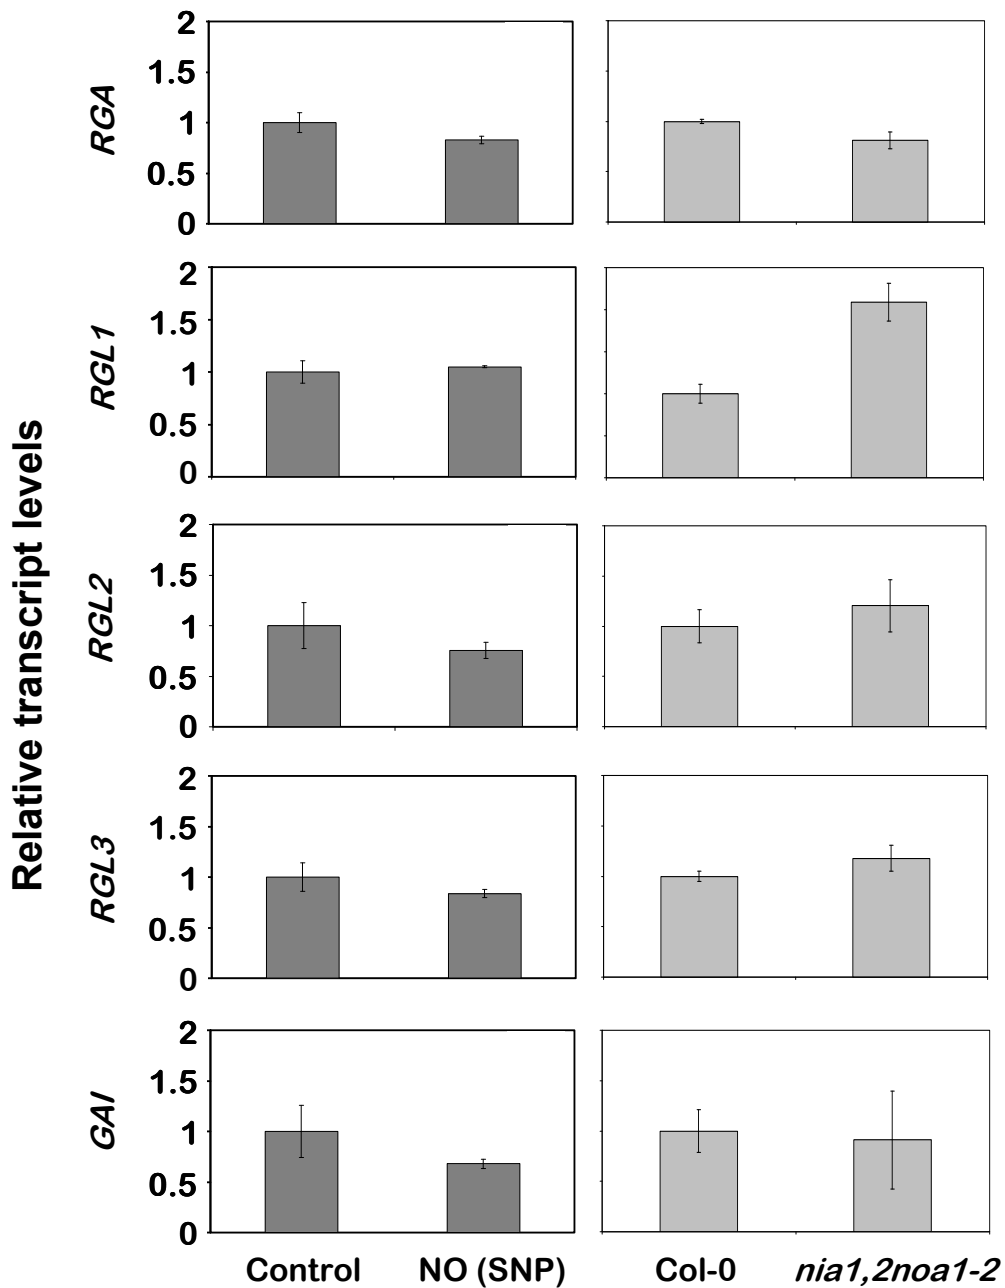

**Figure S3.** Relative transcript levels of genes coding for DELLA proteins in wild type and NO-deficient hypocotyls. Quantitative RT-PCR was used to measure *DELLA* transcript levels with gene specific primers and total RNA isolated from wild type Col-0 or *nia1nia2noa1-2* hypocotyls of seedlings grown under red light either untreated (Control) or treated with 1 mM of the NO donor SNP for 2 h. Values are normalized with the endogenous levels of *ACTIN2* transcript and are relative to those of Col-0 untreated samples. Values are the mean of three independent replicates  $\pm$  standard error.

Fig. S4

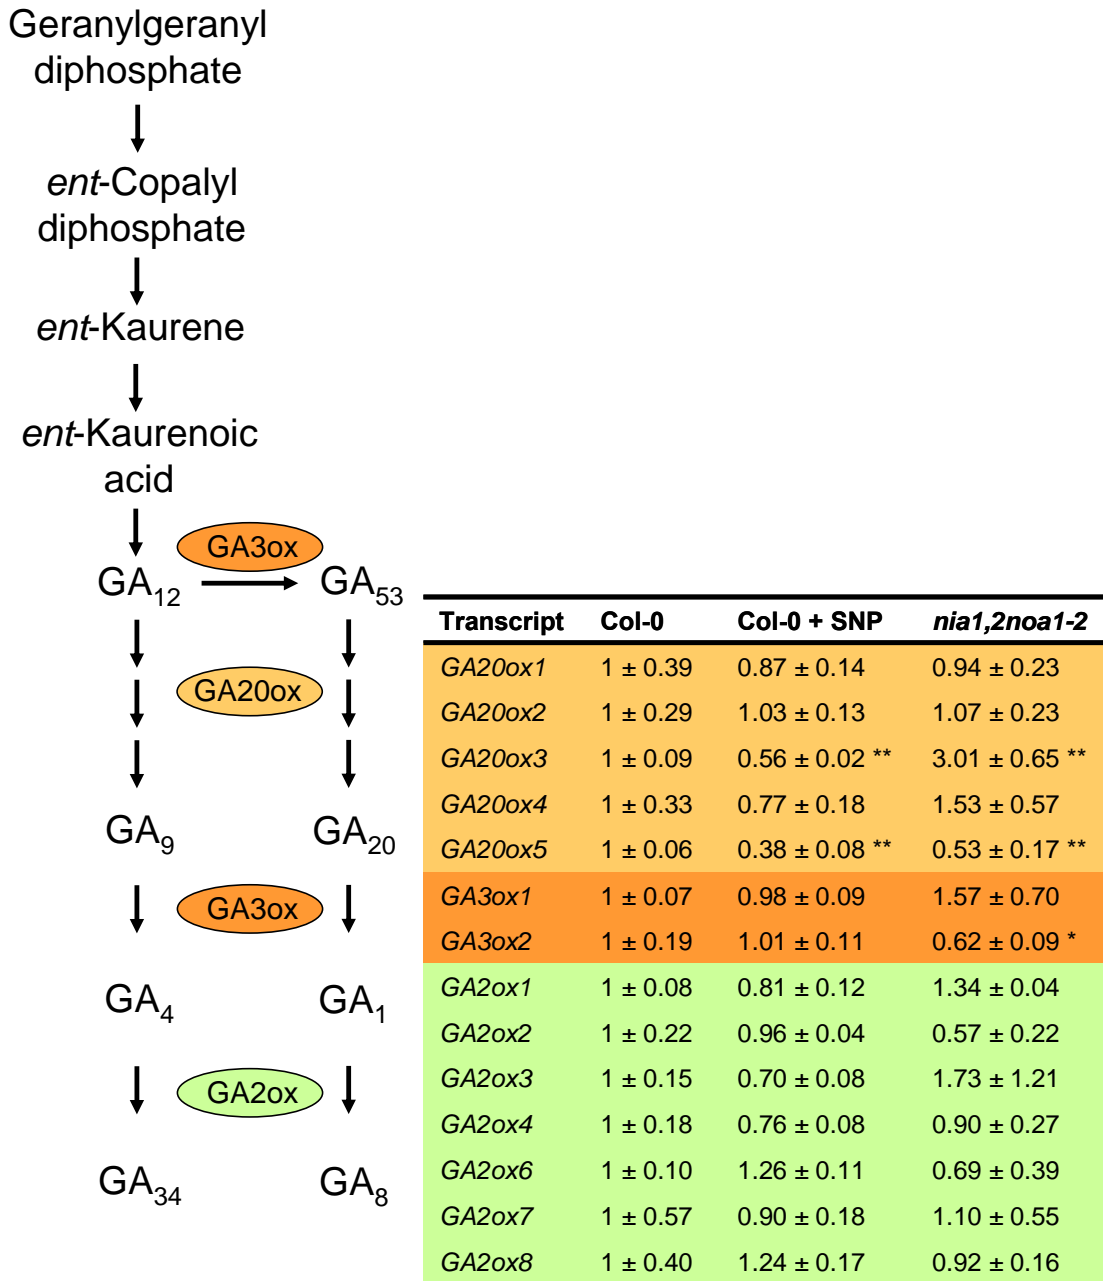

**Figure S4.** Biosynthetic pathway of gibberellins in *Arabidopsis* and levels of the biosynthetic and catabolic gene transcripts in hypocotyls of wild type Col-0, either treated with 1 mM of SNP as exogenous NO donor for 2 h or untreated as control, as well as in the NO-deficient *nia1nia2noa1-2* mutant seedlings grown under red light. Values are normalized with the endogenous levels of *ACTIN2* transcript and are relative to those of Col-0 untreated samples. Values are the mean of three independent replicates ± standard error. \* and \*\* represent statistically significant differences after Student t-test with  $p < 0.05$  and  $0.01$ , respectively.

Fig. S5

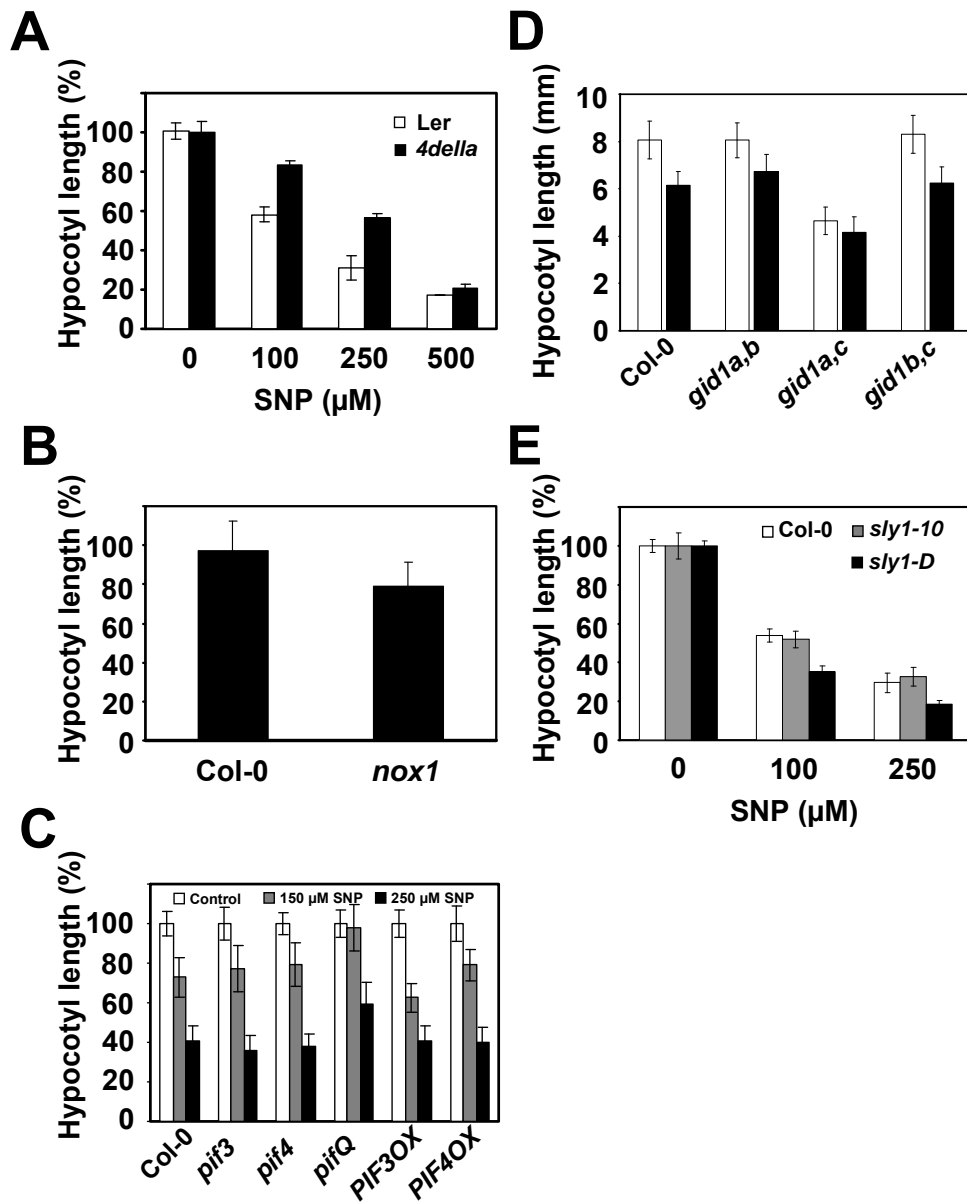

**Figure S5.** Control experiments corresponding to Figures 1, 3, 5 and 6 performed in darkness.
